# Supplementary material for: Increased cytotoxicity of Pb2+ with co-exposures to a mitochondrial uncoupler and mitochondrial calcium uniporter inhibitor
Source: Royal Society of Chemistry journal article supplement (doi:10.1039/d3em00188a), 2023-01-01
Supplement: d3em00188a1.pdf [file d3em00188a1.pdf]

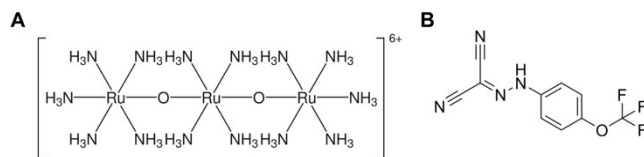

**Figure S1.** Chemical structures of RuRed and FCCP. **A)** Chemical structure of Ruthenium Red. **B)** Chemical structure of carbonyl cyanide-p-trifluoromethoxyphenylhydrazone (FCCP).

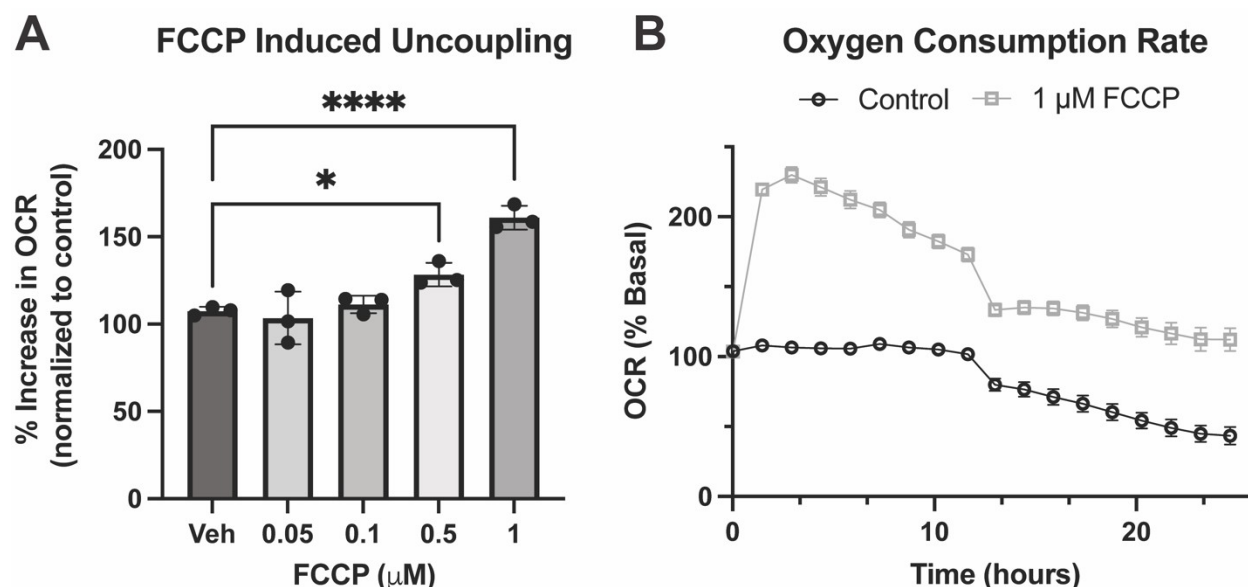

**Figure S2.** FCCP-induced mitochondrial uncoupling. **A)** Levels of FCCP-induced uncoupling with various FCCP concentrations. The y-axis represents the percentage increase in the oxygen consumption rate (OCR) normalized to the vehicle control. Data was analyzed via one-way ANOVA with a Dunnett's post-hoc test for multiple comparisons. \*:  $p < 0.05$ , \*\*\*\*:  $p < 0.0001$ . **B)** Representative OCR traces obtained from a Seahorse XF Analyzer over the course of 24 hours, following an injection of 1 μM FCCP. OCR is represented as % basal OCR, prior to the injection of FCCP. The decrease in both groups observed at the 12-hour time point is associated with stopping and starting the Seahorse instrument, as it is unable to run an assay longer than 12 hours.

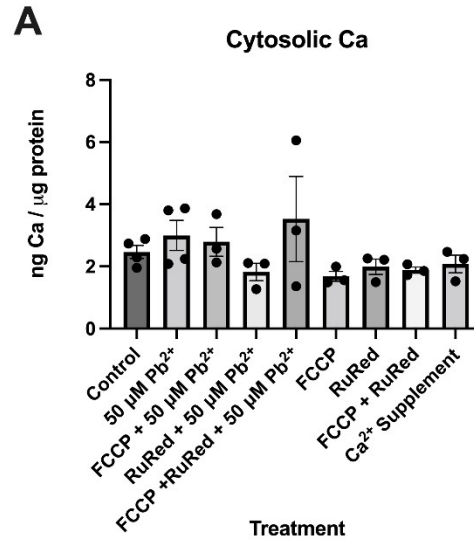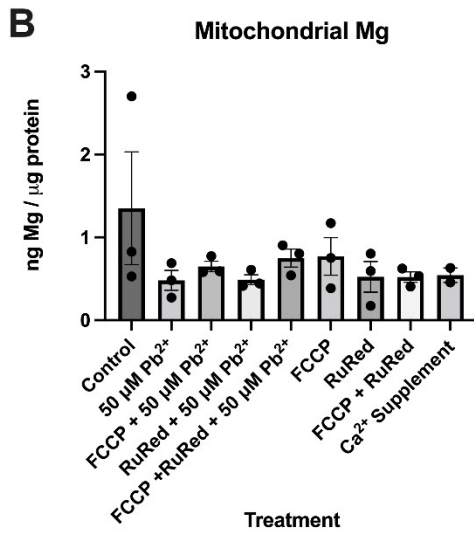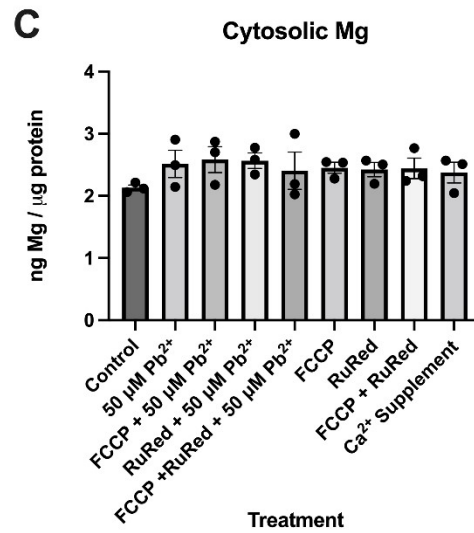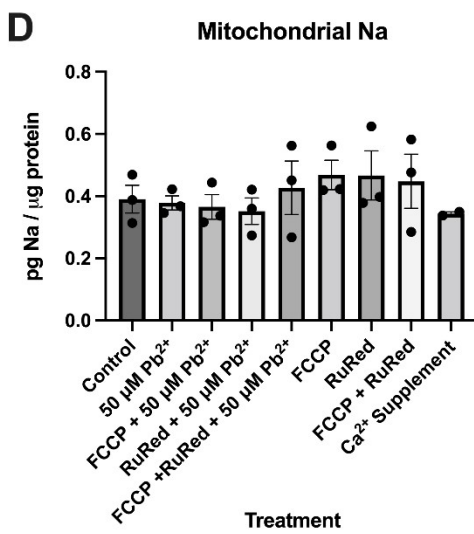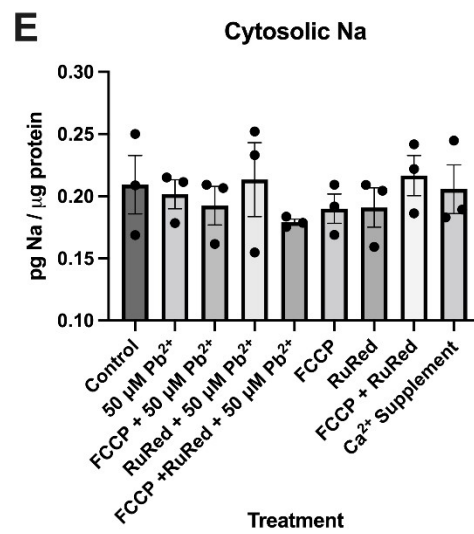

**Figure S3.** Analyte levels in mitochondrial and cytosolic fractions across treatment groups. **A)** Levels of cytosolic calcium levels represented as ng of calcium per  $\mu\text{g}$  of protein, as determined by a BCA assay. **B)** Levels of mitochondrial magnesium levels represented as ng of magnesium per  $\mu\text{g}$  of protein, as determined by a BCA assay. **C)** Levels of cytosolic magnesium levels represented as ng of magnesium per  $\mu\text{g}$  of protein, as determined by a BCA assay. **D)** Levels of mitochondrial sodium levels represented as pg of sodium per  $\mu\text{g}$  of protein, as determined by a BCA assay. **E)** Levels of cytosolic sodium levels represented as pg of sodium per  $\mu\text{g}$  of protein, as determined by a BCA assay. For all figures, data was analyzed via one-way ANOVA.

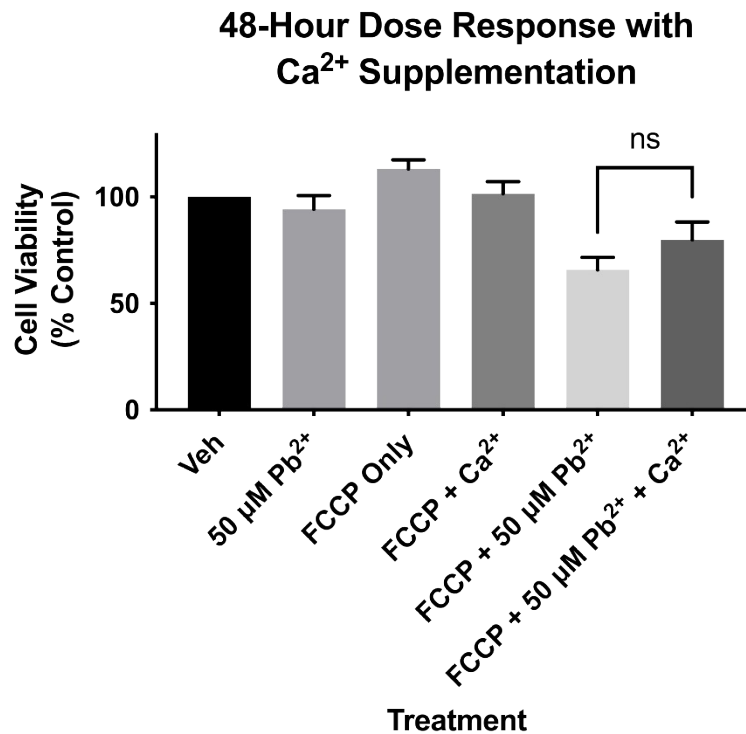

**Figure S4.** Calcium supplementation does not offer a rescue to the increased cytotoxicity in combination with FCCP. Cell viability following a 48-hour exposure to 50  $\mu\text{M}$   $\text{Pb}^{2+}$  and FCCP is not rescued by  $\text{Ca}^{2+}$  supplementation. FCCP and 50  $\mu\text{M}$   $\text{Pb}^{2+}$  corresponds to a 35% reduction in cell viability. FCCP, 50  $\mu\text{M}$   $\text{Pb}^{2+}$ , and  $\text{Ca}^{2+}$  is associated with a 20% reduction in cell viability. Data is analyzed via one-way ANOVA with a Tukey's post-hoc test for multiple comparisons between FCCP and  $\text{Pb}^{2+}$  exposure with the FCCP,  $\text{Pb}^{2+}$ , and  $\text{Ca}^{2+}$  exposure ( $p=0.4184$ ).

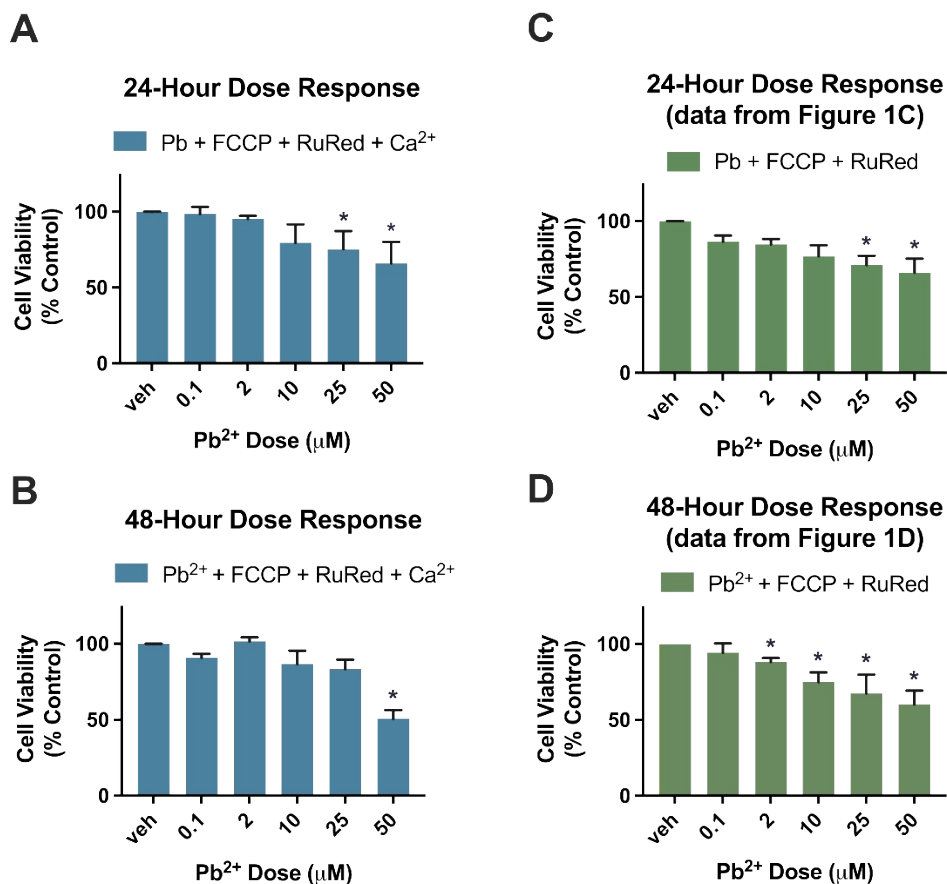

**Figure S5.** Calcium supplementation does not offer complete rescue of increased cytotoxicity in combination with FCCP and RuRed at 24 hours, but some protection at a 48-hour exposure to low doses of Pb<sup>2+</sup>. These figures are to be directly compared back to the green columns in Figure 1C and Figure 1D, which represent the original dose response curves performed in the absence of a calcium supplementation and have been reprinted in panels C and D of this figure. **A**) 24-hour dose response curve for a mixture of Pb<sup>2+</sup>, RuRed, FCCP, and a Ca<sup>2+</sup> supplementation. Cell viability is significantly decreased at 25 and 50 μM Pb<sup>2+</sup> doses (25 μM: 25%, p=0.0381 50 μM: 35%, p=0.0399). **B**) 48-hour dose response curve for a mixture of Pb<sup>2+</sup>, RuRed, FCCP, and a Ca<sup>2+</sup> supplementation. With Ca<sup>2+</sup> supplementation, cell viability is no longer significantly decreased at 2, 10, and 25 μM Pb<sup>2+</sup> doses, however at 50 μM Pb<sup>2+</sup>, there is still an observed 50% reduction in cell viability (p<0.001). Data was analyzed via one-way ANOVA with a Tukey's post-hoc test for multiple comparisons to the control. **C**) 24-hour dose response following exposure to Pb<sup>2+</sup> and FCCP and RuRed. Exposure to a mixture of all chemicals results in a significant decrease in cell viability at multiple Pb<sup>2+</sup> concentrations (25 μM: 30%, p=0.0067, 50 μM: 34%, p=0.0256). Data was analyzed via two-way ANOVA with a Dunnett's post-hoc test for multiple comparisons of each group to the control. Pb<sup>2+</sup> dose: p=0.003, Additional compound: p<0.0001, interaction: p=0.3513. **D**) 48-hour dose response following exposure to Pb<sup>2+</sup> and FCCP and RuRed. Exposure to a mixture of all chemicals results in a significant decrease in cell viability at multiple Pb<sup>2+</sup> concentrations (2 μM: 12%, p=0.0328, 10 μM: 25%,

p=0.0234, 25  $\mu$ M: 33%, p=0.0007, 50  $\mu$ M: 40%, p=0.0008). Data was analyzed via two-way ANOVA with a Dunnett's post-hoc test for multiple comparisons of each group to the control. Pb<sup>2+</sup> dose: p<0.0001, Additional compound: p<0.0001, interaction: p=0.0082. Fluorescence values recorded by the resazurin assay corresponding to the cell viability have been normalized to the control group and are presented as a percentage of the control on all graphs.
